# Supplementary material
Source: ML conference proceedings conference paper supplement (https://openreview.net/forum?id=Pnaq8Sd4Ql)
Supplement: supplementary_material [file attachment]

# Self-Supervised Emotion Representation Disentanglement for Speech-Preserving Facial Expression Manipulation

## Supplementary Material

Anonymous Author(s)

### 1 QUANTITATIVE COMPARISONS

In the main manuscript, we present average metrics for comparing our SSERD framework with current state-of-the-art methods. Here, we provide detailed metrics for each emotion to facilitate comprehensive comparisons, as shown in Tables 1 and 2. Our framework demonstrates superior performance across various emotions in all three metrics. For instance, considering the 'Fear' emotion, our framework shows a notable improvement over the NED method in the MEAD dataset. In the intra-identity setting, it reduces FAD and LSE-D by 52.9% and 9.7%, respectively, while increasing CSIM by 5.2%. In the cross-identity setting, it decreases FAD and LSE-D by 55.5% and 3.9%, respectively, and enhances CSIM by 1.9%. Similarly, compared to the DSM method on the RAVDESS dataset, our framework reduces FAD and LSE-D by 43.7%

and 4.2%, respectively, and increases CSIM by 5.2% in the intra-identity setting. In the cross-identity setting, it decreases FAD and LSE-D by 39.3% and 5.7%, respectively, and improves CSIM by 1.3%.

### 2 QUALITATIVE COMPARISONS

In the main manuscript, we present some visualization examples for qualitative comparisons between current state-of-the-art methods and our SSERD framework. Expanding upon this, we provide additional examples on the MEAD and RAVDESS datasets, as depicted in Figures 1, and 2. Consistent with the findings reported in the main manuscript, our framework demonstrates superior image realism, lip synchronization, and emotion similarity across both datasets.

| Settings | Metrics | Methods | Neutral      | Angry        | Disgusted    | Fear         | Happy        | Sad          | Surprised    | Avg.         |
|----------|---------|---------|--------------|--------------|--------------|--------------|--------------|--------------|--------------|--------------|
| Intra-ID | FAD↓    | ICface  | 7.114        | 6.420        | 7.383        | 6.567        | 6.213        | 7.301        | 5.567        | 6.795        |
|          |         | DSM     | 2.572        | 2.156        | 2.125        | 2.364        | 1.951        | 1.985        | 1.908        | 2.152        |
|          |         | NED     | 0.906        | 2.177        | 3.838        | 1.659        | 1.939        | 2.538        | 1.700        | 2.108        |
|          |         | Ours    | <b>0.473</b> | <b>0.683</b> | <b>0.820</b> | <b>0.781</b> | <b>0.648</b> | <b>0.808</b> | <b>0.965</b> | <b>0.740</b> |
|          | LSE-D↓  | ICface  | 9.760        | 10.483       | 10.433       | 9.855        | 10.180       | 10.017       | 9.851        | 10.083       |
|          |         | DSM     | 9.452        | 9.835        | 9.272        | 9.676        | 9.664        | 9.594        | 9.266        | 9.531        |
|          |         | NED     | 9.264        | 9.579        | 9.128        | 10.172       | <b>9.137</b> | <b>9.074</b> | 9.821        | 9.454        |
|          |         | Ours    | <b>8.964</b> | <b>9.188</b> | <b>8.796</b> | <b>9.181</b> | 9.315        | 9.253        | <b>9.188</b> | <b>9.126</b> |
|          | CSIM↑   | ICface  | 0.779        | 0.741        | 0.805        | 0.754        | 0.775        | 0.755        | 0.817        | 0.775        |
|          |         | DSM     | 0.806        | 0.780        | 0.815        | 0.790        | 0.815        | 0.821        | 0.818        | 0.806        |
|          |         | NED     | 0.883        | 0.802        | 0.772        | 0.848        | 0.839        | 0.812        | 0.864        | 0.831        |
|          |         | Ours    | <b>0.908</b> | <b>0.874</b> | <b>0.929</b> | <b>0.892</b> | <b>0.908</b> | <b>0.914</b> | <b>0.906</b> | <b>0.904</b> |
| Cross-ID | FAD↓    | ICface  | 10.560       | 9.470        | 9.230        | 9.122        | 8.493        | 10.364       | 9.541        | 9.540        |
|          |         | EAT     | 5.354        | 7.103        | 6.737        | 6.198        | 6.160        | 6.114        | 5.635        | 6.186        |
|          |         | DSM     | 1.916        | 5.071        | 4.991        | 4.686        | 5.274        | 4.943        | 4.338        | 4.460        |
|          |         | NED     | 2.022        | 4.851        | 5.094        | 4.983        | 3.919        | 5.665        | 4.600        | 4.448        |
|          |         | Ours    | <b>0.490</b> | <b>3.308</b> | <b>4.011</b> | <b>2.215</b> | <b>2.307</b> | <b>2.483</b> | <b>2.360</b> | <b>2.453</b> |
|          | LSE-D↓  | ICface  | 11.226       | 11.073       | 11.184       | 11.204       | 11.322       | 11.526       | 11.133       | 11.238       |
|          |         | EAT     | 9.616        | 9.653        | 9.574        | 9.435        | 9.562        | 9.507        | 9.508        | 9.551        |
|          |         | DSM     | 9.801        | 9.888        | 10.157       | 9.739        | 9.518        | 9.961        | 10.357       | 9.917        |
|          |         | NED     | 9.812        | 9.904        | 10.121       | 9.741        | 9.936        | 10.179       | 9.646        | 9.906        |
|          |         | Ours    | <b>8.956</b> | <b>9.016</b> | <b>9.051</b> | <b>9.364</b> | <b>9.304</b> | <b>9.299</b> | <b>9.410</b> | <b>9.200</b> |
|          | CSIM↑   | ICface  | 0.705        | 0.648        | 0.637        | 0.727        | 0.717        | 0.664        | 0.721        | 0.688        |
|          |         | EAT     | 0.761        | 0.736        | 0.756        | 0.764        | 0.791        | 0.696        | 0.823        | 0.761        |
|          |         | DSM     | 0.866        | 0.753        | 0.784        | 0.737        | 0.777        | 0.744        | 0.787        | 0.778        |
|          |         | NED     | 0.841        | 0.717        | 0.791        | 0.750        | 0.842        | 0.691        | 0.780        | 0.773        |
|          |         | Ours    | <b>0.908</b> | <b>0.799</b> | <b>0.843</b> | <b>0.837</b> | <b>0.858</b> | <b>0.838</b> | <b>0.852</b> | <b>0.848</b> |

Table 1: Comparison results of FAD, LSE-D and CSIM of our framework and competing methods in the intra-identity and cross-identity settings on the MEAD dataset.

| Settings | Metrics | Methods | Neutral      | Angry        | Disgusted    | Fear         | Happy        | Sad          | Surprised    | Avg.         |
|----------|---------|---------|--------------|--------------|--------------|--------------|--------------|--------------|--------------|--------------|
| Intra-ID | FAD↓    | ICface  | 9.816        | 7.047        | 8.689        | 8.413        | 8.413        | 8.086        | 8.636        | 8.443        |
|          |         | DSM     | 1.653        | 2.833        | 3.161        | 2.122        | 2.186        | <b>1.937</b> | 2.601        | 2.354        |
|          |         | NED     | 2.041        | 3.288        | 4.144        | 2.635        | 3.714        | 2.595        | 2.980        | 3.057        |
|          |         | Ours    | <b>1.021</b> | <b>1.127</b> | <b>1.287</b> | <b>1.483</b> | <b>1.161</b> | 1.999        | <b>1.718</b> | <b>1.399</b> |
|          | LSE-D↓  | ICface  | 8.209        | 9.504        | 8.296        | 8.523        | 8.902        | 8.346        | 7.578        | 8.480        |
|          |         | DSM     | 7.697        | 7.860        | 7.698        | 7.201        | 7.820        | 7.656        | 7.641        | 7.653        |
|          |         | NED     | <b>7.376</b> | <b>7.757</b> | 7.822        | 7.452        | 7.742        | 7.560        | <b>7.226</b> | 7.562        |
|          |         | Ours    | 7.578        | 7.786        | <b>7.428</b> | <b>7.136</b> | <b>7.472</b> | <b>7.363</b> | 7.326        | <b>7.441</b> |
|          | CSIM↑   | ICface  | 0.749        | 0.703        | 0.775        | 0.722        | 0.797        | 0.766        | 0.772        | 0.755        |
|          |         | DSM     | 0.879        | <b>0.812</b> | 0.889        | 0.857        | 0.895        | 0.899        | 0.865        | 0.871        |
|          |         | NED     | 0.847        | 0.805        | 0.786        | 0.842        | 0.793        | 0.855        | 0.848        | 0.825        |
|          |         | Ours    | <b>0.898</b> | 0.810        | <b>0.927</b> | <b>0.886</b> | <b>0.914</b> | <b>0.932</b> | <b>0.894</b> | <b>0.894</b> |
| Cross-ID | FAD↓    | ICface  | 10.478       | 8.704        | 9.260        | 9.106        | 9.061        | 9.639        | 9.718        | 9.424        |
|          |         | EAT     | 6.680        | 8.384        | 8.591        | 8.655        | 8.239        | 7.937        | 7.914        | 8.051        |
|          |         | DSM     | 1.883        | 4.705        | 6.865        | 4.802        | 3.818        | 4.438        | 3.292        | 4.258        |
|          |         | NED     | 3.558        | 5.546        | <b>5.008</b> | 5.648        | 5.648        | 5.588        | 5.145        | 5.412        |
|          |         | Ours    | <b>1.085</b> | <b>4.045</b> | 5.785        | <b>3.431</b> | <b>3.336</b> | <b>3.063</b> | <b>2.772</b> | <b>3.360</b> |
|          | LSE-D↓  | ICface  | 10.736       | 12.415       | 11.860       | 11.279       | 11.150       | 11.305       | 12.028       | 11.539       |
|          |         | EAT     | 8.223        | 8.028        | 8.089        | 8.085        | 8.369        | 8.203        | 8.080        | 8.154        |
|          |         | DSM     | 8.141        | 8.357        | 8.286        | 8.247        | 8.277        | 8.048        | 8.109        | 8.209        |
|          |         | NED     | 7.856        | 8.085        | 8.107        | 8.151        | 8.073        | 8.006        | 7.962        | 8.034        |
|          |         | Ours    | <b>7.557</b> | <b>7.587</b> | <b>7.595</b> | <b>7.690</b> | <b>7.524</b> | <b>7.693</b> | <b>7.704</b> | <b>7.621</b> |
|          | CSIM↑   | ICface  | 0.677        | 0.646        | 0.717        | 0.649        | 0.738        | 0.666        | 0.644        | 0.677        |
|          |         | EAT     | 0.697        | 0.636        | 0.674        | 0.574        | 0.785        | 0.632        | 0.679        | 0.668        |
|          |         | DSM     | 0.848        | 0.707        | 0.694        | 0.732        | 0.801        | 0.745        | 0.762        | 0.756        |
|          |         | NED     | 0.820        | <b>0.766</b> | <b>0.741</b> | 0.749        | 0.804        | 0.726        | 0.713        | 0.760        |
|          |         | Ours    | <b>0.898</b> | 0.737        | 0.676        | <b>0.759</b> | <b>0.809</b> | <b>0.856</b> | <b>0.794</b> | <b>0.790</b> |

**Table 2: Comparison results of FAD, LSE-D and CSIM of our framework and competing methods in the intra-identity and cross-identity settings on the RAVDESS dataset.**

| Emotions  | Realism |     |            |     |            | Emotion similarity |            |            |            |            | Mouth shape similarity |     |            |     |            |
|-----------|---------|-----|------------|-----|------------|--------------------|------------|------------|------------|------------|------------------------|-----|------------|-----|------------|
|           | ICface  | EAT | DSM        | NED | Ours       | ICface             | EAT        | DSM        | NED        | Ours       | ICface                 | EAT | DSM        | NED | Ours       |
| Neutral   | 4%      | 14% | 11%        | 7%  | <b>64%</b> | 4%                 | 11%        | 11%        | 25%        | <b>50%</b> | 4%                     | 14% | 14%        | 14% | <b>54%</b> |
| Angry     | 0%      | 5%  | 26%        | 33% | <b>37%</b> | 2%                 | 14%        | 21%        | <b>33%</b> | 30%        | 0%                     | 9%  | <b>35%</b> | 21% | <b>35%</b> |
| Disgusted | 2%      | 24% | <b>29%</b> | 20% | 24%        | 0%                 | 20%        | <b>27%</b> | <b>27%</b> | <b>27%</b> | 0%                     | 12% | 29%        | 24% | <b>34%</b> |
| Fear      | 0%      | 9%  | 24%        | 9%  | <b>58%</b> | 0%                 | 20%        | 11%        | 18%        | <b>51%</b> | 0%                     | 9%  | 22%        | 16% | <b>53%</b> |
| Happy     | 0%      | 14% | 26%        | 21% | <b>40%</b> | 0%                 | 23%        | 21%        | 16%        | <b>40%</b> | 0%                     | 7%  | 30%        | 19% | <b>44%</b> |
| Sad       | 0%      | 13% | <b>36%</b> | 15% | <b>36%</b> | 3%                 | 10%        | 26%        | 18%        | <b>44%</b> | 3%                     | 10% | 23%        | 15% | <b>49%</b> |
| Surprised | 2%      | 17% | <b>29%</b> | 24% | 27%        | 2%                 | <b>34%</b> | 24%        | 22%        | 17%        | 2%                     | 20% | 17%        | 24% | <b>37%</b> |
| All       | 1%      | 14% | 26%        | 19% | <b>40%</b> | 1%                 | 19%        | 20%        | 22%        | <b>36%</b> | 1%                     | 11% | 25%        | 19% | <b>43%</b> |

**Table 3: Realism, emotion similarity, and mouth shape similarity ratings of each emotion of the user study.**

### 3 USER STUDY & VIDEO EXAMPLES

In the main manuscript, we present the aggregate voting results from our user study. This section provides a detailed breakdown of the voting results for each emotion. As illustrated in Table 3, our framework achieves higher ratings for mouth shape similarity across various emotions. Additionally, it receives the highest ratings for image realism and emotional similarity in the 'Neutral', 'Fear', 'Happy', and 'Sad' categories. However, our framework exhibits a limitation in accurately expressing the 'Surprise' emotion, which appears inconsistent with the results presented in Tables

1 and 2. This discrepancy likely stems from the variability in the expressiveness of the actors within the dataset. In some cases, the expressions of surprise conveyed by the actors do not seem entirely appropriate, according to our assessment. Therefore, although our method achieves superior quantitative metrics by generating images that more closely align with the real distribution, this fidelity results in lower scores when evaluated by human judges.

All videos used in our user study are included in the supplementary materials for review purposes. On the online platform, we have carefully organized the videos from different methods to

ensure unbiased voting outcomes. For clearer visual comparison, the videos in the supplementary materials are arranged as follows: the first and second columns display the source and reference

images, respectively, while the subsequent columns show the results generated by ICface, DSM, NED, EAT, and our framework.

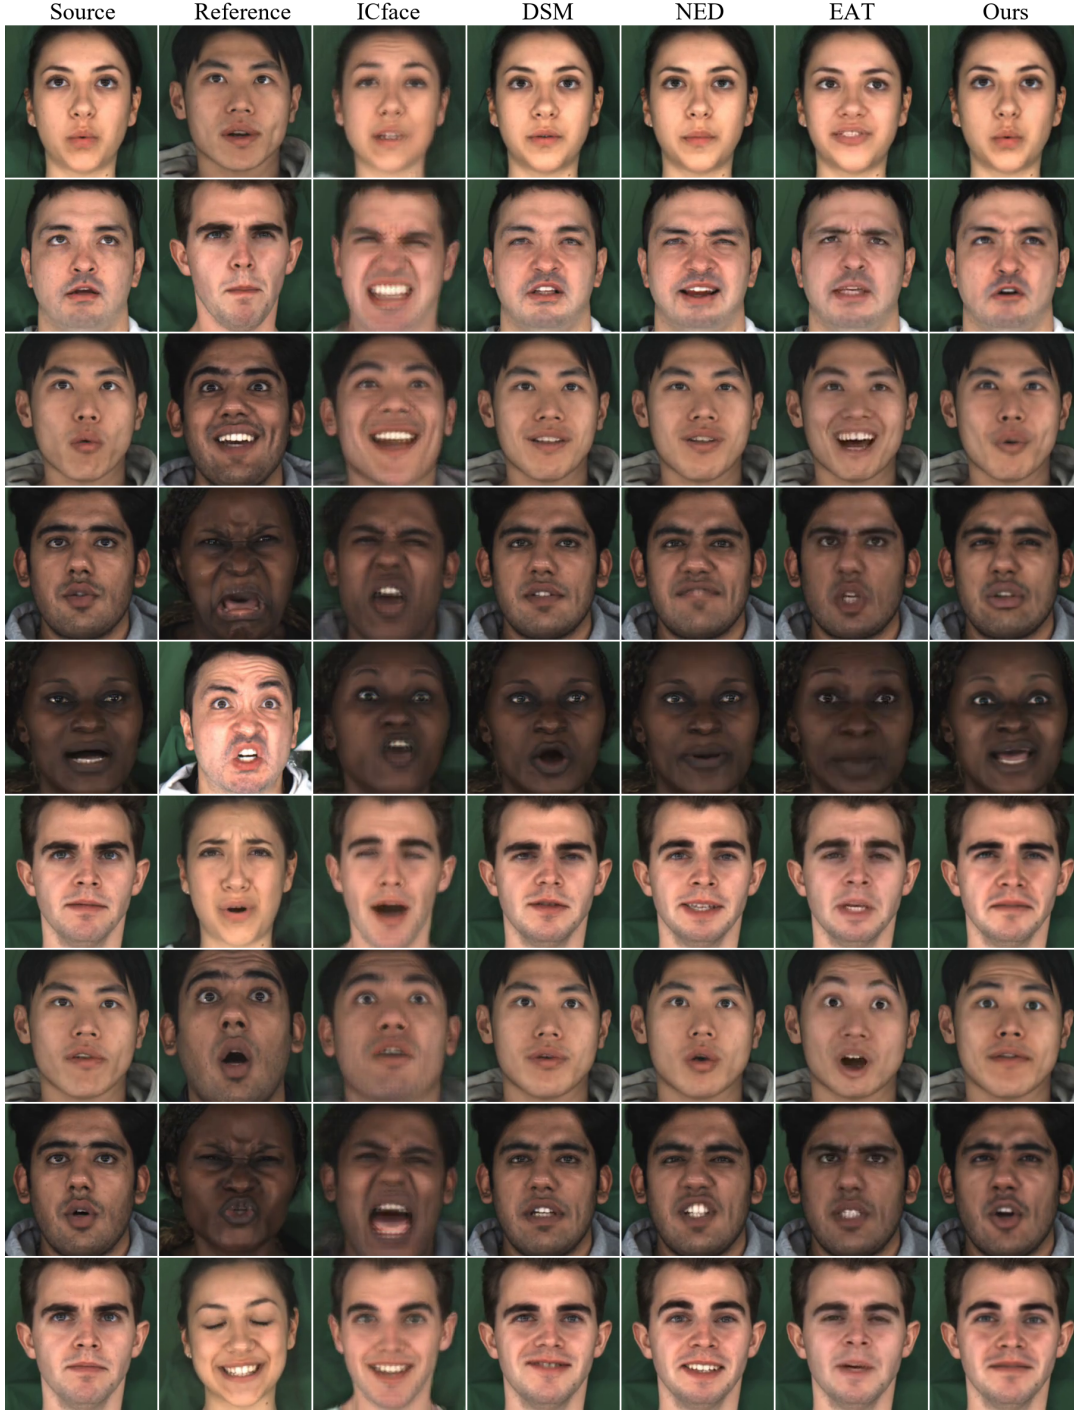

**Figure 1: Qualitative comparisons with state-of-the-art methods on the MEAD dataset. Our framework produces expressive talking faces featuring natural expressions and synchronized lip movements.**



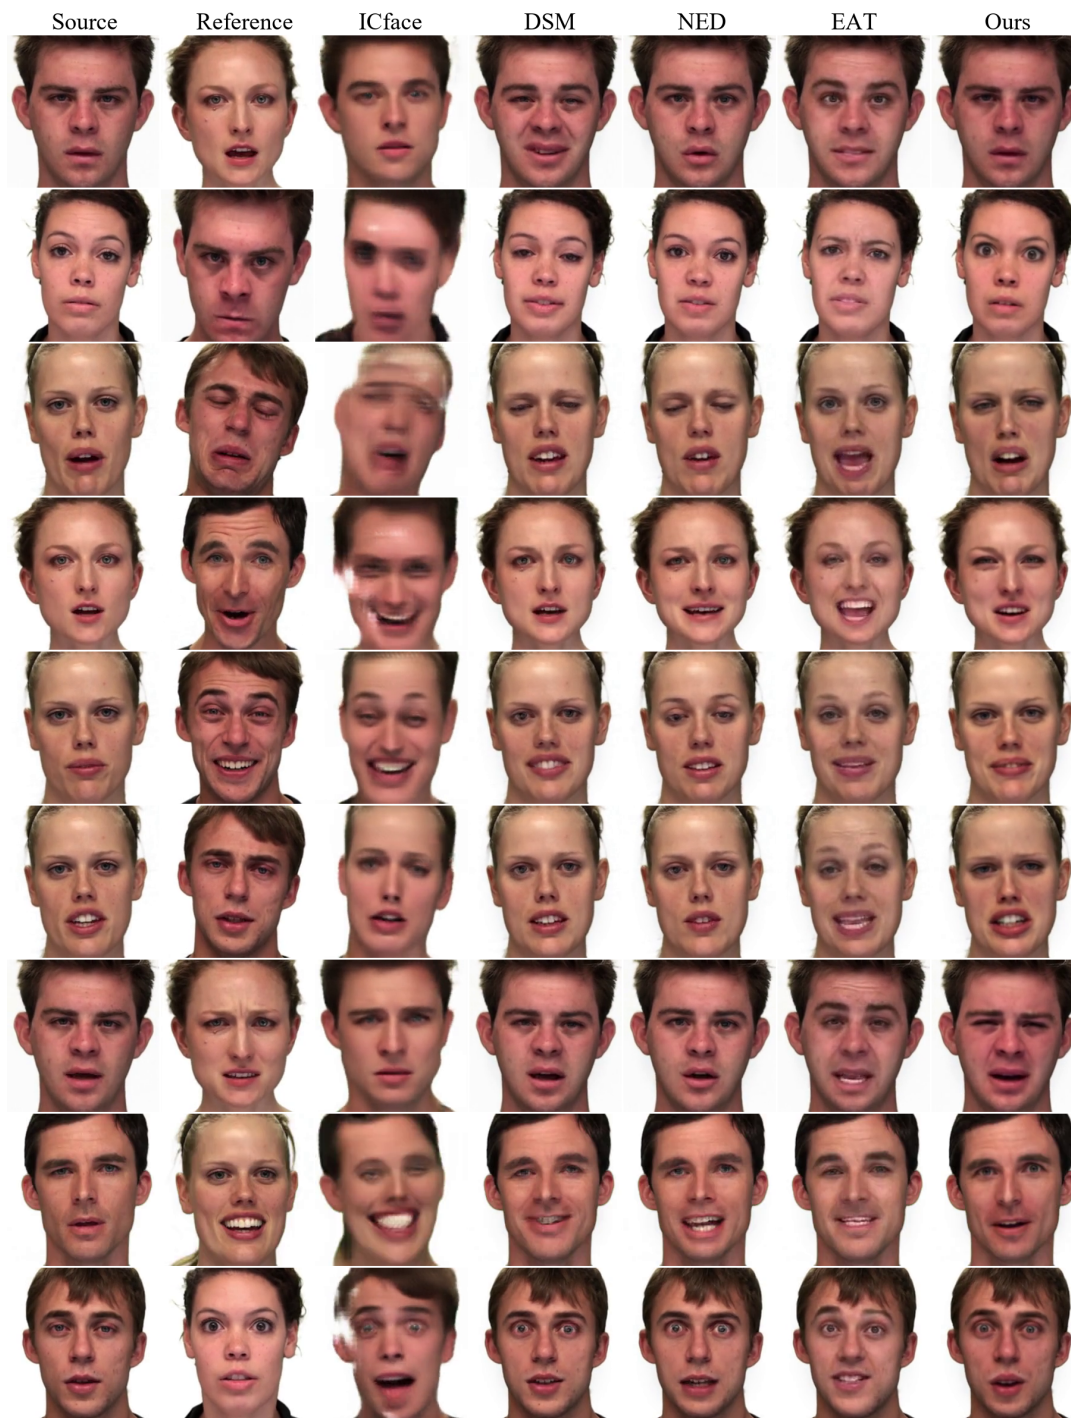

**Figure 2: Qualitative comparisons with state-of-the-art methods on the RAVDESS dataset. Our framework produces expressive talking faces featuring natural expressions and synchronized lip movements.**
